# Supplementary material for: Excellent red upconversion luminescence in GdLaO3:Er3+/Yb3+/Sc3+ under 980 nm laser excitation
Source: Royal Society of Chemistry journal article supplement (doi:10.1039/d4tc01015a), 2024-01-01
Supplement: d4tc01015a1.pdf [file d4tc01015a1.pdf]

## Supporting Information

### Excellent red upconversion luminescence in $\text{GdLaO}_3:\text{Er}^{3+}/\text{Yb}^{3+}/\text{Sc}^{3+}$ under 980 nm laser excitation

Meiling Li<sup>1</sup>, Yongze Cao<sup>1\*</sup>, Lihong Cheng<sup>1</sup>, Tianshuo Liu<sup>2</sup>, Yuhan Fan<sup>1</sup>, Jinsu Zhang<sup>1</sup>, and Baojiu Chen<sup>1\*</sup>

<sup>1</sup>Department of Physics, Dalian Maritime University, Dalian, 116026, China

<sup>2</sup>Department of Physics and Astronomy, University College London, Gower St., London WC1E 6BT, United Kingdom

\*Corresponding authors: cyz@dmlu.edu.cn (Y. Cao); bjchen@dmlu.edu.cn (B. Chen)

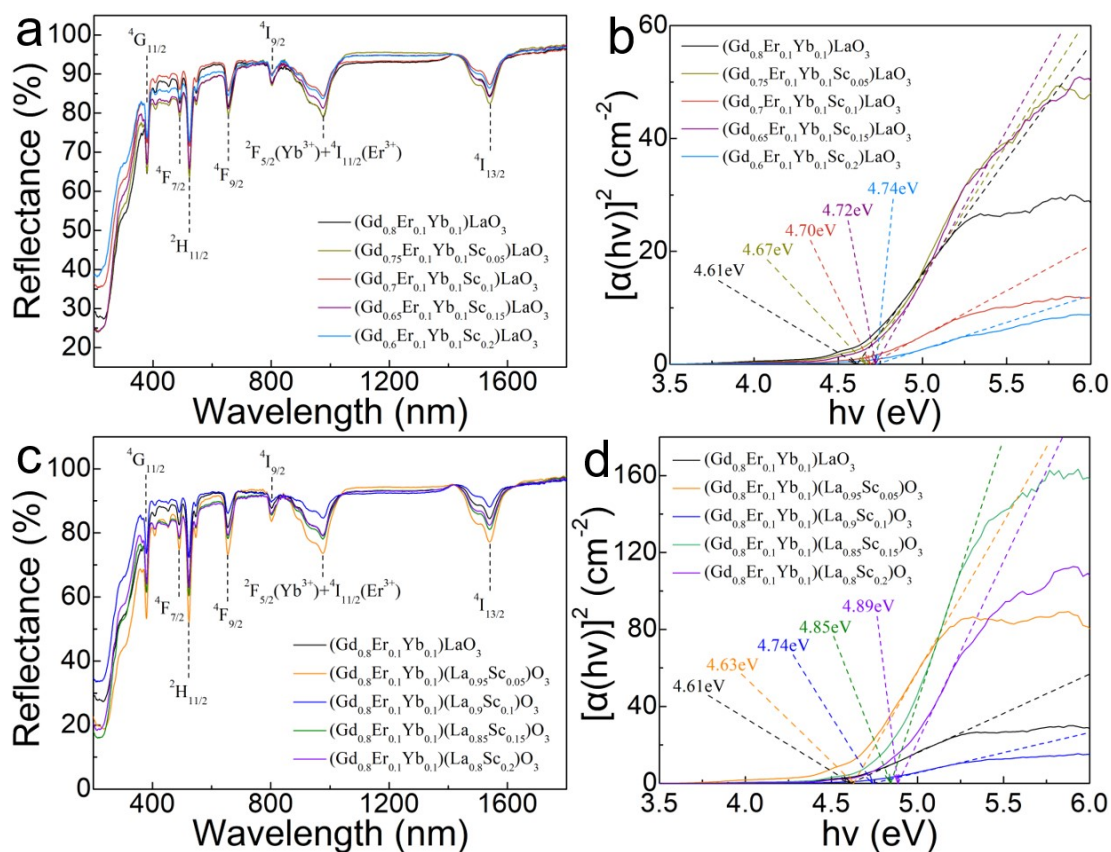

**Fig. S1.** Diffuse reflectance spectra of  $(\text{Gd}_{0.8-x}\text{Er}_{0.1}\text{Yb}_{0.1}\text{Sc}_x)\text{LaO}_3$  (x=0, 0.05, 0.1, 0.15, 0.2) phosphors (a) and  $(\text{Gd}_{0.8}\text{Er}_{0.1}\text{Yb}_{0.1})(\text{La}_{1-x}\text{Sc}_x)\text{O}_3$  (x=0, 0.05, 0.1, 0.15, 0.2) phosphors (c). (b) and (d) are corresponding calculated bandgap values.

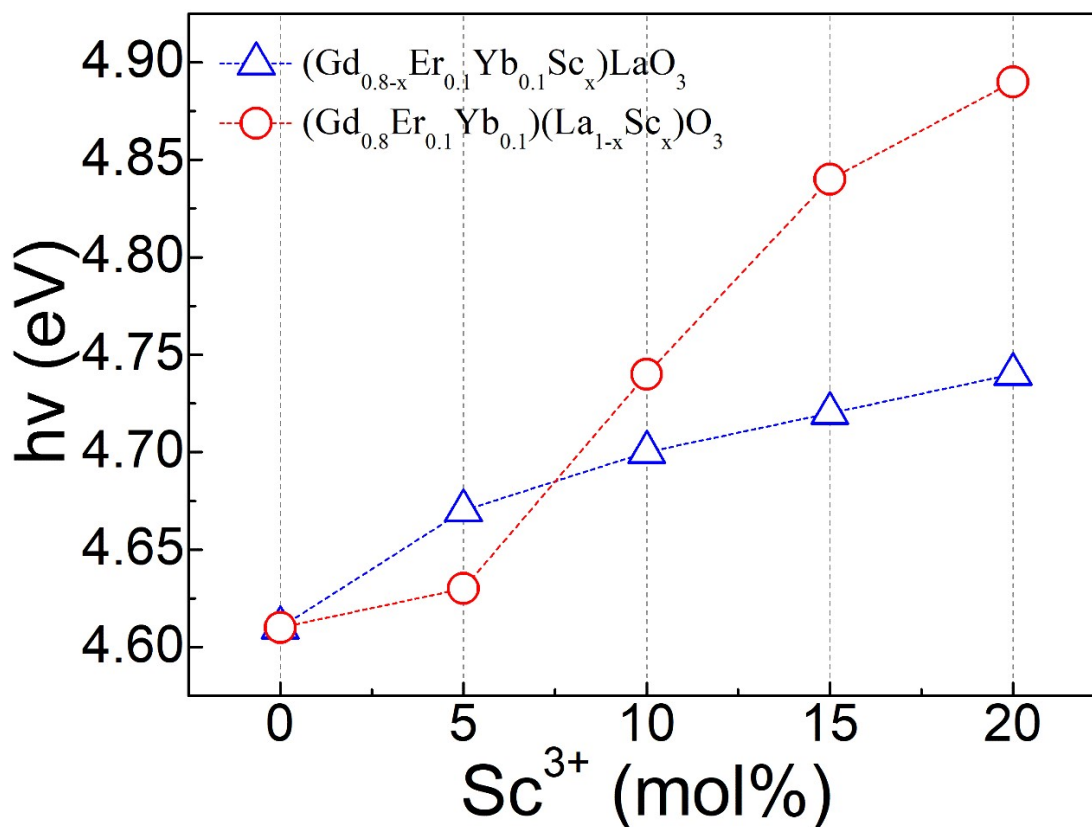

Fig. S2. Relationship between bandgap and doping Sc<sup>3+</sup> concentration in (Gd<sub>0.8-x</sub>Er<sub>0.1</sub>Yb<sub>0.1</sub>Sc<sub>x</sub>)LaO<sub>3</sub> (x=0, 0.05, 0.1, 0.15, 0.2) and (Gd<sub>0.8</sub>Er<sub>0.1</sub>Yb<sub>0.1</sub>)(La<sub>1-x</sub>Sc<sub>x</sub>)O<sub>3</sub> (x=0, 0.05, 0.1, 0.15, 0.2) phosphors.

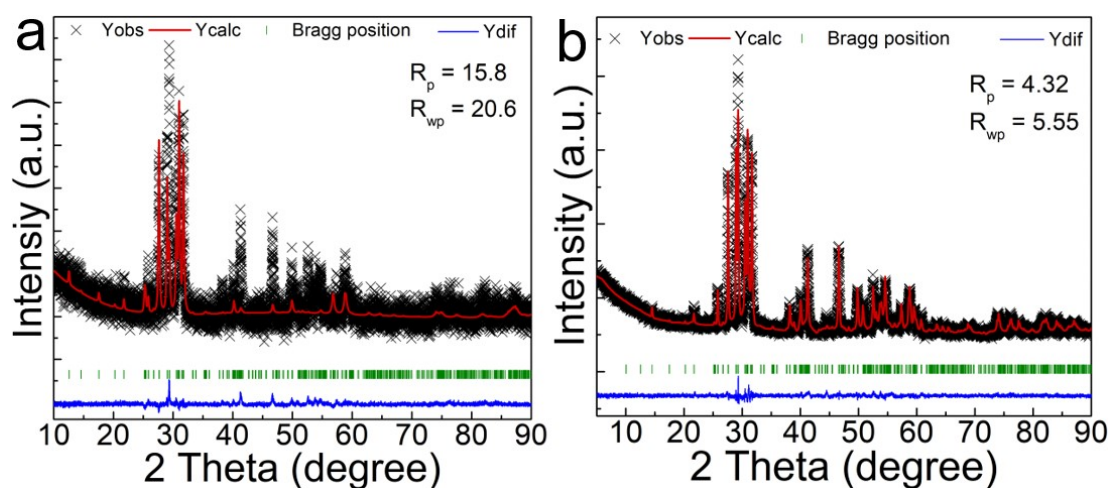

Fig. S3 (a) Rietveld refinement of the assumption with Er<sup>3+</sup> and Yb<sup>3+</sup> replacing Gd<sup>3+</sup>, Sc<sup>3+</sup> replacing La<sup>3+</sup>, (b) Rietveld refinement of the assumption with Er<sup>3+</sup>/Yb<sup>3+</sup>/Sc<sup>3+</sup> randomly replacing Gd<sup>3+</sup> and La<sup>3+</sup> in (Gd<sub>0.8</sub>Er<sub>0.1</sub>Yb<sub>0.1</sub>)(La<sub>0.9</sub>Sc<sub>0.1</sub>)O<sub>3</sub>, respectively.

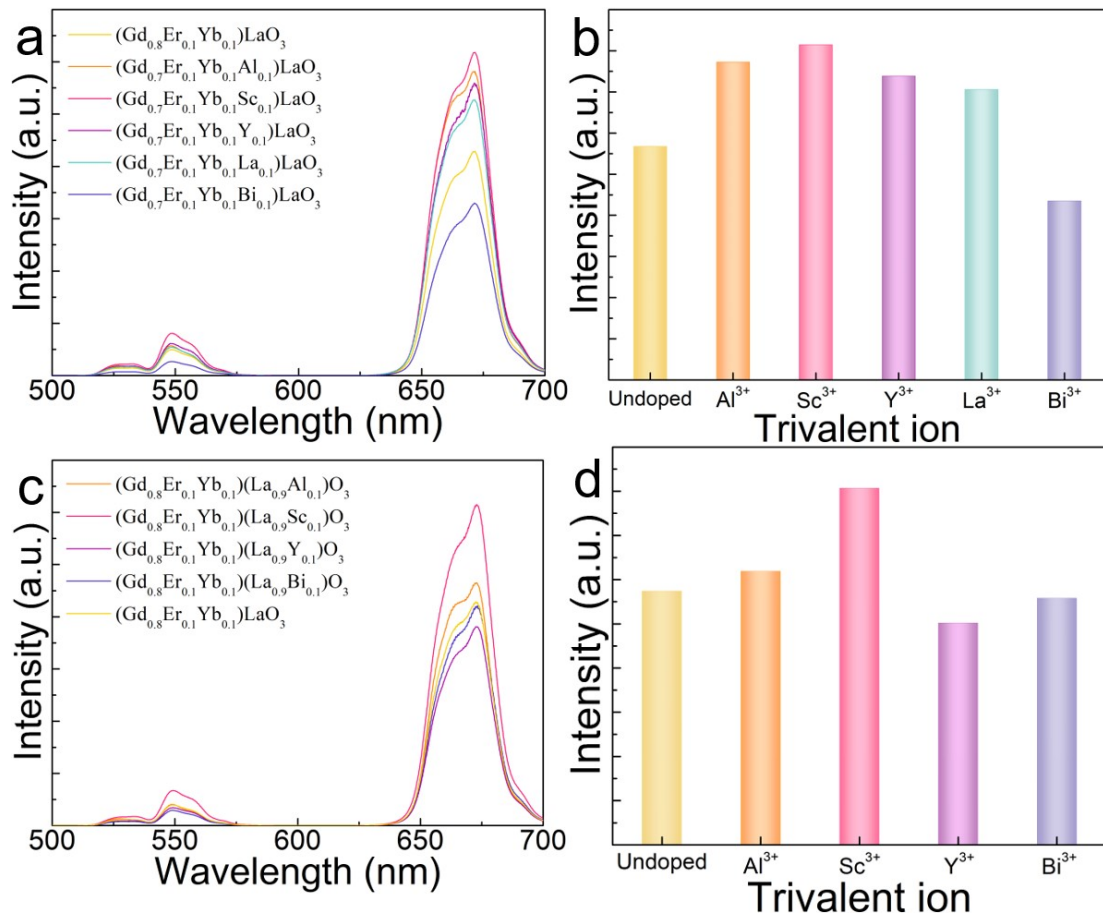

**Fig. S4.** UCL emission spectra of (a)  $(\text{Gd}_{0.8}\text{Er}_{0.1}\text{Yb}_{0.1})\text{LaO}_3$  and  $(\text{Gd}_{0.7}\text{Er}_{0.1}\text{Yb}_{0.1}\text{X}_{0.1})\text{LaO}_3$  (X =  $\text{Al}^{3+}$ ,  $\text{Sc}^{3+}$ ,  $\text{Y}^{3+}$ ,  $\text{La}^{3+}$ ,  $\text{Bi}^{3+}$ ) phosphors as well as (b)  $(\text{Gd}_{0.8}\text{Er}_{0.1}\text{Yb}_{0.1})\text{LaO}_3$  and  $(\text{Gd}_{0.8}\text{Er}_{0.1}\text{Yb}_{0.1})(\text{La}_{0.9}\text{X}_{0.1})\text{O}_3$  (X =  $\text{Al}^{3+}$ ,  $\text{Sc}^{3+}$ ,  $\text{Y}^{3+}$ ,  $\text{Bi}^{3+}$ ) phosphors. (b) and (d) show corresponding emission intensity trends as the radius of doping trivalent ions changes.
